1  
2  
3  
4  
5  
6  
7  
8  
9  
10  
11  
12  
13  
14  
15  
16  
17  
18  
19  
20  
21

## **Genetics of mouse behavioral and peripheral neural responses to sucrose**

Cailu Lin<sup>1</sup>, Masashi Inoue<sup>1,2</sup>, Xia Li<sup>1,3</sup>, Natalia P. Bosak<sup>1</sup>, Yutaka Ishiwatari<sup>1,4</sup>, Michael G. Tordoff<sup>1</sup>, Gary K. Beauchamp<sup>1</sup>, Alexander A. Bachmanov<sup>1,5\*</sup>, and Danielle R. Reed<sup>1\*</sup>

<sup>1</sup>Monell Chemical Senses Center, Philadelphia, Pennsylvania, United States of America

<sup>2</sup>Laboratory of Cellular Neurobiology, School of Life Science, Tokyo University of Pharmacy and Life Science, Hachioji, Tokyo, Japan

<sup>3</sup>Current address: Sonora Quest Laboratories, Phoenix, Arizona, United States of America

<sup>4</sup>Current address: Ajinomoto Co., Inc., Tokyo, Japan

<sup>5</sup>Current Location: GlaxoSmithKline, Collegeville, Pennsylvania, United States of America

\* Corresponding author

E-mail: [reed@monell.org](mailto:reed@monell.org) (DRR)

22 **Acknowledgments**

23 We gratefully acknowledge Maria L. Theodorides, Zakiyyah Smith, Mauricio Avigdor,  
24 and Amy Colihan for assistance with animal breeding. We also acknowledge Richard Copeland  
25 and the consistent high-quality assistance of the animal care staff at the Monell Chemical  
26 Senses Center and thank them for their service. Yutaka Ishiwatari assisted with genotyping  
27 markers.

28 **DECLARATIONS**

29 **Conflict of interest statement:** On behalf of all authors, the corresponding author states that  
30 there are no conflicts of interest.

31 **Funding:** National Institutes of Health grants R01 DC00882, R03 DC03854 (AAB and GKB),  
32 R01 AA11028, R03 TW007429 (AAB), R03 DC03509, R01 DC04188, R01 DK55853, R01  
33 DK094759, R01 DK058797, P30 DC011735, S10 OD018125, S10 RR025607, S10 RR026752,  
34 and G20 OD020296 (DRR) and institutional funds from the Monell Chemical Senses Center  
35 supported this work, including genotyping and the purchase of equipment. The Center for  
36 Inherited Disease Research through the auspices of the National Institutes of Health provided  
37 genotyping services.

38 **Ethics approval:** All animal procedures in this study were approved by the Institutional Care  
39 and Use Committee of the Monell Chemical Senses Center.

40 **Consent to participate:** Not applicable.

41 **Consent for publication:** Not applicable.

42 **Availability of data and material:**

43 **Code availability:** Not applicable.

44 **Accession IDs:**

45

46 **Author contributions**

47 AB and DR designed the study. CL conducted the study. CL and DR analyzed data. MI conduct  
48 electrophysiological experiment. XL and NB genotyped mice. CL and DR wrote the paper. AB,  
49 MT and GB commented and edited the paper. All authors read the paper and approved its  
50 contents.

51

52 **Abstract**

53 Mice of the C57BL/6ByJ (B6) strain have higher consumption of, and stronger peripheral neural  
54 responses to, sucrose solution than do mice of the 129P3/J (129) strain. To identify quantitative  
55 trait loci (QTLs) responsible for this strain difference and evaluate the contribution of peripheral  
56 taste responsiveness to individual differences in sucrose intake, we produced an intercross (F<sub>2</sub>)  
57 of 627 mice, measured their sucrose consumption in two-bottle choice tests, recorded the  
58 electrophysiological activity of the chorda tympani nerve elicited by sucrose in a subset of F<sub>2</sub>  
59 mice, and genotyped the mice with DNA markers distributed in every mouse chromosome. We  
60 confirmed a sucrose consumption QTL (*Scon2*, or *Sac*) on mouse chromosome (Chr) 4,  
61 harboring the *Tas1r3* gene, which encodes the sweet taste receptor subunit T1R3 and affects  
62 both behavioral and neural responses to sucrose. For sucrose consumption, we also detected  
63 five new main-effect QTLs *Scon6* (Chr2), *Scon7* (Chr5), *Scon8* (Chr8), *Scon3* (Chr9) and a sex-  
64 specific QTL *Scon9* (Chr15), and an interacting QTL pair *Scon4* (Chr1) and *Scon3* (Chr9). No  
65 additional QTLs for the taste nerve responses to sucrose were detected besides the previously  
66 known one on Chr4 (*Scon2*). Identification of the causal genes and variants for these sucrose  
67 consumption QTLs may point to novel mechanisms beyond peripheral taste sensitivity that  
68 could be harnessed to control obesity and diabetes.

69 Key words: sucrose intake; sweet taste; genetics; QTL; chorda tympani gustatory nerve  
70 response

71 **Introduction**

72 Inbred mouse strains C57BL/6ByJ (B6) and 129P3/J (129) differ in sucrose consumption  
73 (Bachmanov, Reed et al. 1996, Bachmanov, Tordoff et al. 1996, Bachmanov, Reed et al. 1997,  
74 Bachmanov, Tordoff et al. 2001, Inoue, Reed et al. 2004, Sclafani 2004, Sclafani and Ackroff  
75 2004, Inoue, Glendinning et al. 2007, de Araujo, Oliveira-Maia et al. 2008, Bachmanov, Bosak  
76 et al. 2011), with heritability ranging from 36% to 78%, depending on the measure of  
77 consumption used. There is a high heritability for sucrose intake but relatively low heritability for  
78 sucrose preference score owing to a ceiling effect (i.e., preference scores are nearly 100% for  
79 concentrated sucrose). The heritability of sucrose intake is partially determined by a genetic  
80 locus (*Scon2*, or *Sac*) on distal Chr4, which corresponds to the “sweet taste” gene (*Tas1r3*)  
81 coding for the T1R3 protein (Bachmanov, Li et al. 2001, Li, Staszewski et al. 2002, Reed, Li et  
82 al. 2004). Allelic variation in this gene affects consumption of sucrose and the other sweeteners  
83 (Inoue, Reed et al. 2004, Reed, Li et al. 2004, Inoue, Glendinning et al. 2007).

84 However, the *Scon2/Sac* locus explains only a part of the phenotypic variation in  
85 sucrose consumption. Knocking out the *Tas1r3* gene eliminates most behavioral responses to  
86 some sweeteners (Damak, Rong et al. 2003, Zhao, Zhang et al. 2003), but these mice still  
87 prefer concentrated sucrose, which suggests that genetic loci other than *Scon2/Sac* affect  
88 sucrose intake (Damak, Rong et al. 2003, Zhao, Zhang et al. 2003).

89 It is unknown whether these additional genetic loci act via peripheral taste mechanisms  
90 or postoral mechanisms (for example, by influencing sucrose metabolism). To assess whether  
91 genetic loci affect the peripheral taste mechanisms, investigators measure responses in the  
92 chorda tympani gustatory nerve to oral stimulation with sucrose (Ninomiya, Kajiura et al. 1993,  
93 Bachmanov, Reed et al. 1997, Inoue, McCaughey et al. 2001, Damak, Rong et al. 2003,  
94 Danilova and Hellekant 2003).

## Genetic controls of sucrose intake

95 To detect novel quantitative trait loci (QTLs) that affect sucrose consumption (measured as  
96 sucrose solution intakes and preference scores in two-bottle choice tests), we intercrossed the  
97 B6 and 129 strains and conducted linkage analyses of the F<sub>2</sub> mice; neural responses to sucrose  
98 were recorded in a subset of these F<sub>2</sub> mice. To describe the genetic architecture of behavioral  
99 and neural responses to sucrose, we included epistasis and sex-specific effects in our statistical  
100 analysis strategy. We detected seven QTLs and named them sucrose consumption QTL 2-4, 6-  
101 9 (symbols *Scon2-4, 6-9*), which are mapped to Chr4, 9, 1, 2, 5, 8 and 15, respectively (*Scon1*  
102 and *Scon5* QTLs were detected in previous studies). We considered linkages for intakes and  
103 preference scores across sucrose concentrations as the same QTL if confidence intervals for  
104 different phenotypic measures overlapped and QTLs with the same effect direction. Our  
105 previous studies (Bachmanov, Li et al. 2001, Inoue, Reed et al. 2004, Reed, Li et al. 2004,  
106 Inoue, Glendinning et al. 2007) have shown that *Scon2*, *Sac* (saccharin preference locus) and  
107 *Tas1r3* (taste receptor, type 1, member 3 gene) are identical, and so here we use *Scon2* to  
108 describe linkages to the distal Chr4 (154.4-156.5 Mb) for 120 mM and 300 mM sucrose intakes  
109 and preferences as well as neural responses to sucrose (100-1000 mM).

## 110 **Materials and methods**

111 ***Animals and breeding.*** The B6 (stock no. 001139) and 129 (stock no. 000690) inbred mice  
112 were obtained from The Jackson Laboratory (Bar Harbor, ME, USA) and intercrossed to  
113 produce F<sub>1</sub> and F<sub>2</sub> hybrids in the Animal Facility of Monell Chemical Senses Center, located in  
114 Philadelphia, Pennsylvania (USA). Pups were weaned at 21-30 days of age and reared in  
115 groups of the same sex. The mice were housed in a temperature-controlled vivarium at 23°C on  
116 a 12/12-hr light-dark cycle, with lights off at 7 pm, barring unusual circumstances (e.g., power  
117 outages), and had ad lib access to tap water and food (Rodent Diet 8604, Harlan Teklad,  
118 Madison, WI, USA). We bred F<sub>2</sub> mice for two separate experiments (**S1 Table**). All animal

119 procedures in this study were approved by the Institutional Care and Use Committee of the  
120 Monell Chemical Senses Center.

121 ***Phenotyping.***

122 *Two-bottle taste preference tests.* All F<sub>2</sub> mice were tested for their intake and preference for  
123 sucrose and other solutions using two-bottle taste preference tests. Mice from the parental B6  
124 and 129 strains (20 of each strain) were also included in the two-bottle tests in Experiment 2  
125 (described below).

126 Procedure details for the two-bottle taste test have been described elsewhere (Tordoff  
127 MG 2001, Bachmanov, Reed et al. 2002, Bachmanov, Reed et al. 2002, Bachmanov, Reed et  
128 al. 2002). In brief, individually caged mice were presented with one tube containing a taste  
129 solution in deionized water and another tube containing deionized water only. Daily  
130 measurements were made in the middle of the light period by reading fluid volume to the  
131 nearest 0.1 ml. The positions of the tubes were switched every day to control for positional  
132 preferences (some mice prefer to drink from one side regardless of the contents of the tube).  
133 For 2 days before testing, mice were offered both tubes with deionized water.

134 Here, we present data for 96-hr (4-day) two-bottle tests with 3, 120, and 300 mM  
135 sucrose obtained in two experiments. In addition to sucrose, mice were also tested with other  
136 solutions (data are not shown). In **Experiment 1** (F<sub>2</sub> males only) mice were offered the following  
137 taste solutions in this order: 300 and 75 mM NaCl, 120 mM sucrose, 0.1 mM citric acid, 10%  
138 ethanol, and 0.03 mM quinine hydrochloride. In **Experiment 2** (B6, 129, and F<sub>2</sub>; females and  
139 males) mice were offered the following taste solutions in this order: 30 mM glycine, 30 mM D-  
140 phenylalanine, 20 and 1 mM saccharin, 120, 300, 3 mM sucrose, 1 and 300 mM monosodium  
141 salt of L-glutamic acid (MSG), 3% and 10% ethanol, and 0.03 mM quinine hydrochloride. We  
142 purchased all taste compounds from Sigma Chemical Co. (St. Louis, MO, USA), except the  
143 ethanol, which was purchased from Pharmco Products (Brookfield, CT, USA).

## Genetic controls of sucrose intake

144 Each concentration of a solution was presented for 4 days (Tordoff and Bachmanov  
145 2002). Between tests of each taste compound, mice had water to drink from both tubes for at  
146 least 2 days to reduce potential carryover effects. This procedure was also used with sucrose  
147 between 300 and 3 mM (but not for other concentrations of sucrose and within other  
148 compounds). No measures of water intakes were available for Experiment 2, so we used total  
149 fluid intake of quinine hydrochloride (sum of water intake and quinine solution intake) as mouse  
150 water intakes, because almost all of mice avoid the quinine solution, and thus the measure of  
151 total fluid intake of quinine solution approximately equals water intake.

152 *Electrophysiology.* Electrophysiological experiments were conducted with a subset of 84  
153 F<sub>2</sub> mice selected from Experiments 1 and 2 and an additional F<sub>2</sub> cross (Inoue, Reed et al. 2004)  
154 **(S1 Table)**. The activity of the whole chorda tympani nerve in response to lingual application of  
155 taste solutions was recorded electrophysiologically for the following stimuli for each group of  
156 mice separately: for mice from Experiment 1 (19 males), 10, 30, 100, 300, and 1000 mM  
157 sucrose; for mice from Experiment 2 (58 mice: 29 males, 29 females), 3, 10, 30, 100, 300, 500,  
158 and 1000 mM sucrose; for the 7 additional F<sub>2</sub> mice (2 males, 5 females), 500 mM sucrose. For  
159 all mice, 100 mM NH<sub>4</sub>Cl solution was presented at regular intervals to serve as a reference  
160 stimulus. During chemical stimulation of the tongue, the test solutions flowed for 30 sec (Inoue,  
161 Li et al. 2001, Inoue, McCaughey et al. 2001, Inoue, Reed et al. 2004). Between taste stimuli,  
162 the tongue was rinsed with deionized water for at least 1 min to offset carryover effects. The  
163 magnitude of the integrated response at 20 sec after stimulus onset was measured and  
164 expressed as a proportion of the average of the previous and following responses to 100 mM  
165 NH<sub>4</sub>Cl (Inoue, Li et al. 2001, Inoue, McCaughey et al. 2001).

166 *Body weight and composition.* Body weights were measured before and after each taste  
167 compound was offered in the two-bottle taste preference tests. Body weight did not change  
168 appreciatively during the 4-day taste tests, so we averaged the before and after body weights



## Genetic controls of sucrose intake

169 for some analyses. In addition, we performed body composition analyses for all Experiment 2  
170 mice by necropsy, weighing the epididymal and retroperitoneal adipose depots to the nearest  
171 0.01 g and summing these values as a proxy for total amount of dissectible fat per mouse. At  
172 necropsy we also used a ruler ( $\pm 1$  mm precision) to measure body length from the base of the  
173 teeth to the anus.

174 **Genotyping.** Genomic DNA was extracted and purified from mouse tails by a sodium hydroxide  
175 method or by proteinase K digestion followed by high-salt precipitation (Gentra/Qiagen,  
176 Valencia, CA, USA). In total, 627 mice were genotyped with 429 polymorphic markers (see **S2**  
177 **Table**), with control DNA samples from the F<sub>1</sub> 129 and B6 inbred strains. Genotyping was  
178 conducted in two steps to achieve an average distance of 5.9 Mb between markers and no gap  
179 greater than 40 Mb. First, simple-sequence repeat markers known to be polymorphic between  
180 the parental strains were genotyped to cover all 19 autosomes and the X chromosome (simple  
181 sequence-length polymorphisms). Fluorescently labeled microsatellite primers were amplified by  
182 PCR, and the products were scanned by an ABI 3100 capillary sequencer (Applied Biosystems,  
183 Foster City, CA, USA). Second, single-nucleotide polymorphisms (SNPs) were added to fill gaps  
184 (KBiosciences, Herts, UK). A few SNPs were also genotyped in our laboratory, using primers  
185 and fluorescently labeled probes designed to discriminate alleles using an ABI Prism 7000 real-  
186 time PCR system (ABI Assay-by-Design, Applied Biosystems, Foster City, CA, USA). In a few  
187 cases, we typed an SNP marker and a simple sequence-length polymorphism marker that were  
188 adjacent, in nearly identical physical locations, and pooled these data into a single marker for  
189 linkage analysis. In addition, genotypes associated with coat and eye color were included in the  
190 linkage analysis.

191 **Data analyses.**

192 *Taste solution intake and preference.* For each concentration of taste solution, individual  
193 average solution and water intakes were calculated based on daily intake values. Preference

## Genetic controls of sucrose intake

194 scores were calculated for each mouse as the ratio of the average daily solution intake to  
195 average daily total fluid (solution + water) intake, in percent. Correlations among taste intakes  
196 and preferences for all solutions were evaluated using Pearson's correlation coefficients. For  
197 correlational analyses among different taste solutions, we imputed missing data using an  
198 algorithm implemented in the MICE package (Multivariate Imputation by Chained Equations)  
199 (Resche-Rigon and White 2018) (**S1 Figure**).

200 *Sex, genotype, and dominance effects.* We pooled the data (129, B6, and F<sub>2</sub>) and tested  
201 whether males and females differed by sex and genotype using a two-way ANOVA with sex and  
202 genotype as fixed factors. We tested for dominance effects using with a *t*-test to compare the  
203 mean trait values in the F<sub>2</sub> mice relative to the mean values from the parental strains  
204 (Bachmanov, Reed et al. 1996).

205 *Preparing data for linkage analysis.* Distributions (**S2 Figure**) and sex differences and  
206 normality (**S3 Table**) of the sucrose intakes and preferences of F<sub>2</sub> mice and mice from each  
207 parental strain were analyzed using the R package *fitdistrplus* (Delignette-Muller).

208 To assess whether data need to be adjusted (standardized), we used observed  
209 (unadjusted) data to evaluate the effect of covariates (habitual water intake, sex, age, body fat,  
210 body length, and body weight) on sucrose intake and preference and found that habitual water  
211 intake, age, and sex were bona fide covariates but that body weight, body length, and body  
212 composition were not. For age, the range of age differed between Experiments 1 and 2, but the  
213 ages were similar within each experiment, and therefore standardizing sucrose intake and  
214 preference within each experiment eliminated the variation due to age. Thus, for the linkage  
215 analyses described below, we used data that were adjusted (standardized) separately for each  
216 sucrose concentration tested and for each index (intakes and preferences): for intakes, we  
217 calculated standardized residuals (residual values of the sucrose intake relative to habitual

## Genetic controls of sucrose intake

218 water intake, standardized within sex), and for preference scores, we calculated standardized  
219 scores (sucrose preference scores standardized within sex and experiment, if applicable).

220 We conducted similar analysis for the electrophysiology data. There were effects of sex  
221 but no other *bona fide* covariates. Therefore, we standardized the data within sex and  
222 experiment and used these adjusted (standardized) data for linkage analyses described below.

223 *Linkage analyses.* We first screened the genotype data for errors by determining  
224 whether genotypes were compatible with the preexisting haplotypes; genotypes such as those  
225 that created double recombinants were re-assayed.

226 Genome-wide scans of the F<sub>2</sub> mice for the sucrose consumption and  
227 electrophysiological data were conducted using markers from 19 mouse autosomes and the X  
228 chromosome. The degree of linkage between individual traits and genotypes was computed  
229 using algorithms implemented by the R/QTL1.42 package of R (Broman, Wu et al. 2003).  
230 Genotype probabilities and genotype errors were estimated using the *calc.genoprob* function,  
231 and the missing genotypes were imputed using the *sim.geno* function. Interval mapping by  
232 maximum likelihood estimation (EM algorithm) was conducted to screen for main effect QTLs  
233 using the *scanone* function. The significance of each marker regression result was established  
234 by comparison with 1000 permutations of the observed data using the *n.perm* function. The  
235 main-effect confidence intervals were defined by a drop of 1 LOD (logarithm of the odds) from  
236 peak linked marker and were calculated by applying the *lodint* function and expanded to the  
237 outside markers.

238 We also assessed sex-specific effects using R/QTL to calculate LOD scores for two  
239 models, “sex additive” and “sex additive with interactions” (Solberg, Baum et al. 2004), and we  
240 calculated the difference in LOD scores between the genome scan results obtained by including  
241 these two models separately using the *arithscan* function. To quantify sex-by-genotype  
242 interactions, we compared the fit of the two models using the difference in LOD scores as a

243 metric ( $\Delta$ LOD) and using a cutoff  $\Delta$ LOD 2.0 as a criterion (Lin, Theodorides et al. , Lin,  
244 Theodorides et al. 2013).

245 Two-dimensional genome scans were used to estimate marker pair interactions  
246 (epistasis) using the *scantwo* function. The LOD score cutoff for significant epistasis was  
247 determined by a comparison with 1000 permutation tests at the  $p < 0.05$  level and confirmed in a  
248 general linear model using marker pairs as a fixed factor and habitual water intake as a  
249 covariate.

250 To assess dominant/additive interactions between the QTL alleles, the trait mean for the  
251 129/B6 heterozygotes for the marker at peak linkage was compared with the collapsed trait  
252 value for the 129/129 and B6/B6 homozygotes; these tests were conducted using planned  
253 comparisons.

254 *Statistical models and programs.* For all statistical models, we used a type 1 (sequential)  
255 sum-of-squares model, and when testing for group differences, we used Tukey's HSD tests. We  
256 computed statistical tests with R (version 3.3.3) and RStudio (version 1.0.136) and graphed the  
257 results using either R or Prism 6 (version 6.05; GraphPad Software, La Jolla, CA, USA).

258 **Candidate gene analyses.** We defined the QTL critical regions by 1-LOD drop from the peak  
259 linked marker and expanded them to the most adjacent outside marker. We merged regions for  
260 sucrose QTLs if they were on the same chromosome with overlapping confidence intervals. The  
261 resulting chromosome regions were used to evaluate candidate genes, as follows: *Scon6* @  
262 chr2:100122595-128989913, *Scon2* @ chr4:154415509-1558633334, *Scon7* @ chr5:22747915-  
263 66662082, *Scon8* @ chr8:72545028-129008800, *Scon3* @ chr9:87885544-110762590, *Scon9*  
264 @ chr15: 40369844-71152967. For the critical region of *Scon4* on Chr1 (epistatic QTL), we  
265 defined the region using the peak linked marker *rs3714728* (9.0 Mb) with a 20-Mb flanking  
266 region (chr1:1-19023602). Within these regions, we listed the known genetic variants and  
267 evaluated them in several ways. First, we used information in the Mouse Genomes Project-

268 Query SNPs, indels, or structural variations (Anonymous Mouse Genomes Project - Query  
269 SNPs, indels or SVs. 2011: Wellcome Trust Sanger Institute) to make the list. This database  
270 contains the results of a large-scale genome sequencing project of many inbred mouse strains,  
271 including the 129P2/OlaHsd and C57BL/6J strains (Keane, Goodstadt et al. 2011, Yalcin, Wong  
272 et al. 2011), which are closely related to the 129 and B6 parental inbred strains used in our  
273 study (Yang, Wang et al. 2011). From this list, we identified sequence variants with the potential  
274 to cause functional changes using the PROVEAN web server (Choi and Chan 2015). Next,  
275 using the Mouse Genome Data Viewer (Anonymous), we identified all genes residing within the  
276 chromosome critical regions and classified these candidate genes using the PANTHER system  
277 (Mi, Muruganujan et al. 2013).

278 Using results from the two-dimensional scan, we determined if there were candidate  
279 genes from the interacting QTLs *Scon3* and *Scon4* that had the same or similar biological  
280 function, reasoning that if the two genes have epistatic interaction, they likely act in the same  
281 pathway to regulate sucrose intake. To that end, we identified interacting gene pairs and probed  
282 their protein-protein associations by searching the STRING database (von Mering, Jensen et al.  
283 2005, York, Reineke et al.). We exported gene pairs for protein-protein interactions with  
284 association scores > 0.9, which were computed by benchmarking them against the training set  
285 (von Mering, Jensen et al. 2005), and identified those pairs that fit our criterion (confidence  
286 score = 0.9).

287 Finally, for the genes ( $N=2565$ ) within the QTL confidence intervals, we used publicly  
288 available GEO data (Davis and Meltzer 2007) to compare patterns of these gene expression at  
289 three tissues (striatum, brown and white fat) between the 129S1/SvImJ and C57Bl/6J inbred  
290 strains, which are closely related to the 129 and B6 strains used in our study. For mouse  
291 striatum, we downloaded microarray data for three available samples from each strain (129P3/J  
292 and C57BL/6J; GSE7762 (Korostynski, Piechota et al. 2007)) and conducted gene expression

293 analysis with the web tool GEO2R (<http://www.ncbi.nlm.nih.gov/geo/geo2r>). We calculated the  
294 distribution of fluorescence intensity values for the selected samples and then performed a  
295 linear model for microarray data (LIMMA) statistical test (Smyth 2005) after applying log  
296 transformation to the data. For fat, we downloaded bulk RNASeq data for four available samples  
297 from each strain (129S1/SvImJ and C57Bl/6J; GSE91067 (Raymond E Soccio 2017) and each  
298 tissue (brown and white fat) and transformed the transcript count data. We created a matrix for  
299 the two groups (129 vs B6) and fitted data with the genewise glmFit function of the edgeR  
300 package (Robinson, McCarthy et al. 2010); we conducted likelihood ratio tests for 129 vs B6 for  
301 brown and white fat tissue separately. The differentially expressed genes for the two types of  
302 gene profiling data sets were reported as one log<sub>2</sub>-fold change (corresponding to a twofold  
303 change) with an associated p-value corrected for false discovery (FDR<0.05) for multiple tests  
304 (Benjamini 1995).

## 305 **Results**

### 306 ***Phenotypes***

307 *Sucrose intake; preference in B6, 129, and F<sub>2</sub> mice; and sex-specific hereditary model.*  
308 On average, B6 mice drank significantly more sucrose and had significantly higher preferences  
309 for 3, 120, and 300 mM sucrose than did 129 mice (**Figure 1; S3 Figure**), with F<sub>2</sub> mice falling  
310 between the means of the parental groups. Female mice drank more sucrose on average and  
311 had a higher preference for sucrose compared with male mice of the same genotype (**Figure 1;**  
312 **S3 Figure, S3 Table**). Significant interactions between sex and genotype were observed for  
313 120 and 300 mM sucrose intake and preference but not for 3 mM sucrose (**S4 Table**). For 120  
314 and 300 mM sucrose, all female mice regardless of genotype had similarly high sucrose intakes  
315 and preferences, but B6 males had higher sucrose intakes and preferences than did 129 males  
316 (**Figure 1**). The inheritance pattern was dominant (as measured by the significant difference

## Genetic controls of sucrose intake

317 between the observed mean of the F<sub>2</sub> mice and the theoretical midparent mean) except for 3  
318 and 300 mM sucrose preference in females (**S5 Table**).

319 *Correlations between indexes of consumption of taste solutions.* In the F<sub>2</sub> mice, sucrose  
320 intake correlated with sucrose preference score, but this relationship was weaker at the higher  
321 concentrations (**S6 Table**; observed data), most likely due to a ceiling effect, with truncated  
322 ranges of preference scores for concentrated sucrose (near 100%; **Figure 1**). Within sucrose  
323 intakes and preferences, traits also correlated among concentrations for intakes and preference  
324 scores (**S4 Figure**; imputed data).

325 *Body size and composition.* There were no significant correlations between sucrose  
326 intake and body weight, body length, or body fat in F<sub>2</sub> mice (**S5A-F Figures**) except a weak  
327 correlation between 3 mM sucrose intake and body weight in females ( $r=0.15$ ,  $p=0.02$ ) that did  
328 not extend to the adjusted residual scores of sucrose intakes ( $r=0.09$ ,  $p=0.19$ , **S5B Figure**).  
329 There were similar correlations between sucrose intake and body length in males (3 mM:  
330  $r=0.15$ ,  $p=0.02$ ; 120 mM:  $r=0.16$ ,  $p=0.02$ ; 300 mM:  $r=0.16$ ,  $p=0.02$ ) that did not extend to the  
331 adjusted residual scores of sucrose intakes (**S5E Figure**). There was no correlation between  
332 sucrose preference and body weight, body fat, or body length (**S6A-F Figures**) except for a  
333 weak correlation between 3 mM sucrose preference and body length in females ( $r=0.17$ ,  
334  $p=0.01$ ; **S6F Figure**).

335 *Habitual water intake.* There was a significant mouse strain effect on habitual water  
336 intake ( $F_{(1, 654)} = 18.9$ ,  $p<0.0001$ , two-way ANOVA; **S4 Table**). In the F<sub>2</sub> mice, sucrose intakes  
337 significantly correlated with habitual water intakes, but as expected, the adjusted residual scores  
338 of sucrose intakes did not correlate with habitual water intake (**S5G Figure**). There was no  
339 correlation between habitual water intakes and sucrose preferences, using either unadjusted or  
340 adjusted scores (**S6G Figure**).



## Genetic controls of sucrose intake

341           Sex. In addition to the genotype effects, we observed significant sex and/or sex-by-  
342 genotype interaction effects on sucrose intake, especially for the concentrated sucrose solutions  
343 (120 and 300 mM; **S4 Table**). Significant sex effects on water intake and body weight were  
344 observed (**S4 Table**).

345           Age. When the two-bottle tests began in Experiment 1, the F<sub>2</sub> mice were 66 ± 0.6 days  
346 old (range, 60-90 days); for Experiment 2, the F<sub>2</sub> mice were 162.9 ± 1.2 days old (range, 117-  
347 204 days), and the B6 and 129 mice were 120 ± 3 days old (range, 90-147 days). At the time of  
348 conducting electrophysiological experiments, the F<sub>2</sub> mice from Experiment 1 were 81 ± 0.6 days  
349 old (range, 75-105 days), and those from Experiment 2 were 279 ± 3 days old (range, 234-351  
350 days). The 7 mice from the additional cross were adult (but the exact ages were not recorded).  
351 At the time of performing the body composition analyses, the F<sub>2</sub> mice from Experiment 2 were  
352 267 ± 1.5 days old. There was no significant correlation ( $r < 0.1$ ,  $p > 0.05$ ) between sucrose  
353 consumption (intake and preference) and age (**S5H** and **S6H Figures**), except a weak  
354 correlation between unadjusted but not adjusted 120 mM sucrose preference and age  
355 (unadjusted,  $r = 0.09$ ,  $p = 0.02$ ; adjusted,  $r = 0.01$ ,  $p = 0.88$ ; **S6H Figure**).

### 356 **Linkages**

357           *Main-effect QTLs*. For 120 mM sucrose solution, chromosome mapping identified QTLs  
358 on Chr4 (*Scon2*) and Chr9 (*Scon3*) for both intake (*Scon2*: LOD = 27.1; *Scon3*: LOD = 5.3) and  
359 preference (*Scon2*: LOD = 59.2; *Scon3*: LOD = 4.1), with the B6 allele increasing the traits  
360 (**Figure 2; S7 Table**); because these QTLs for sucrose intake and preference were detected in  
361 the same chromosomal location with overlapping confidence intervals, we named them as the  
362 same QTL symbols (**S7 Table**). There was a QTL on Chr5 (*Scon7*) for 120 sucrose preference  
363 (LOD = 4.1), with the 129 allele increasing the phenotype (**Figure 2; S7 Table**). The LOD  
364 scores of the peak marker, confidence intervals of these QTLs, and fractions of genetic variance  
365 they explain (4-90%) are summarized in the **S7 Table**.



## Genetic controls of sucrose intake

366 For 300 mM sucrose solution, we identified four main effect QTLs for intakes (*Scon6*,  
367 *Scon2*, *Scon8* and *Scon3* on Chr 2, 4, 8, and 9) and *Scon3* (on Chr9) for preference (**Figure 3**;  
368 **S7 Table**), with the B6 allele increasing the trait for all QTLs except for *Scon6*, for which the 129  
369 allele increased the trait. The LOD scores of the peak marker, the confidence intervals of these  
370 QTLs, and fractions of genetic variance they explain (4-26%) are summarized in the **S7 Table**.

371 *Sex-specific QTL*. For 300 mM sucrose intake, there was a male-specific QTL (*Scon9*)  
372 on Chr15 with the peak LOD score of 4.73 at peak marker *rs4230721* (54.7 Mb), with a  
373 confidence interval of 40.3-71.1 Mb (between *rs6396894* and *rs3088560*); it explained 7% of the  
374 genetic variance in sucrose intake, with the B6 allele increasing the phenotype (**Figure 4**). This  
375 male-specific effect was confirmed in a general linear model using habitual water intake as a  
376 covariate (sex:  $F_{(1,444)}=3.59$ ,  $p=0.058$ ; genotype of *rs4230721*:  $F_{(2,444)}=5.08$ ,  $p=0.006$ , sex x  
377 genotype of *rs4230721*:  $F_{(2,444)}=4.05$ ,  $p=0.018$ ).

378 *Epistasis QTL*. Only for 300 mM sucrose intake (but not for other sucrose consumption  
379 measures), the two-dimensional QTL scan identified a significant interaction between markers  
380 of on Chr1 (*rs3714728*, 9.0 Mb; *Scon4*) and Chr9 (*rs4227916*, 108 Mb; *Scon3*; **Figure 5A**). This  
381 epistatic interaction was confirmed by a generalized linear model analysis (**Figure 5B**).

382 *QTL for the electrophysiological taste responses to sucrose*. A QTL for the peripheral  
383 neural responses to 100-1000 mM sucrose solutions was mapped to 155.2-156.5 Mb on Chr4  
384 (*Scon2*, corresponding to the *Sac* locus and the *Tas1r3* gene), with the B6 allele increasing the  
385 phenotype (**Figure 6**). This locus explained 31-69% of the genetic variance, depending on  
386 sucrose concentration (**S7 Table**). There was no effect for lower concentrations (3 and 30 mM)  
387 of sucrose (**S7 Figure**).

388 **Candidate genes and their targeted variants**

## Genetic controls of sucrose intake

389           Within the seven critical chromosome regions (*Scon4* on chr1:1-19023602, *Scon6* on  
390 chr2:100122595-128989913, *Scon2* on chr4:154415509-1558633334, *Scon7* on chr5:22747915  
391 -66662082, *Scon8* on chr8:72545028-129008800, *Scon3* on chr9:87885544-110762590, and  
392 *Scon9* on chr15: 40369844-71152967), there are 2565 genes (**S8 Table**), including the taste  
393 receptor gene *Tas1r3* in the Chr4 QTL region, known to be associated with behavioral and  
394 neural sweet taste responses to sucrose (Inoue, Reed et al. 2004, Bachmanov, Bosak et al.  
395 2011). In total, 1373 missense and stop codon gain or loss variants between parental strains B6  
396 and 129 (**S8 Table**) are within these genes, which include six missense variants, *rs32766606*,  
397 *rs13478071*, *rs13459081*, *rs13478079*, *rs13478082*, and *rs13478081*, within the sweet taste  
398 receptor gene *Tas1r3*. All these genes are grouped based on their molecular functions,  
399 biological processes, cellular components, protein classes and pathways, and more than 30%  
400 genes are categorized into catalytic activity (GO:0003824), about 30% categorized into  
401 metabolic process (GO: 0008152), about 17% categorized into cellular membrane (GO:  
402 0016020), about 2% categorized into membrane traffic protein (PC00150), and about 3%  
403 categorized into opioid related pathways (P05915, P05916, P05917), and 3% categorized into  
404 oxytocin receptor mediated signaling pathway (P04391) (**S9 Table**).

405           Using results from the two-dimensional scan, we determined if there were candidate  
406 genes from the interacting regions that had the same or similar biological function, reasoning  
407 that if the two genes have epistatic interaction, they likely act in the same pathway to regulate  
408 sucrose intake. We identified 15 gene pairs with the association confidence scores > 0.9 and  
409 that contained one gene from the *Scon4* (on Chr1) QTL region and another from the *Scon3* (on  
410 Chr9) QTL region (**S8 Figure, S10 Table**). The interaction of these gene pairs supported the  
411 presence of an epistatic interaction effect on mouse sucrose intake.

412           Gene expression profiling of three mouse tissue sites (striatum, brown and white fat)  
413 revealed differential expression of candidate genes (stratum:  $n=15$ ; brown fat:  $n=37$ , white fat:

414  $n=171$ ) within the QTL regions (**S11 Table**) between 129 and B6 inbred mouse strains (twofold  
415 change with  $FDR < 0.05$ ); the top differentially expressed genes are shown in **Figure 7**.

## 416 **Discussion**

417 In this study, we identified a complex genetic architecture underlying sucrose intake  
418 consisting of seven loci, including one sex-specific locus and an epistatically interacting locus  
419 pair (*Scon3* and *Scon4*). One locus (*Scon2*) on distal Chr4 harbors the *Tas1r3* gene, which  
420 codes for sweet taste receptor subunit T1R3, a major component contributing to behavioral and  
421 neural responses to sucrose in mice (Inoue, Reed et al. 2004, Reed, Li et al. 2004). The other  
422 loci had significant effects on sucrose consumption, but they apparently do not act at the  
423 peripheral level because they did not affect chorda tympani electrophysiological taste responses  
424 to sucrose. Several hormones and neuromodulators act as peripheral sweet taste modulators,  
425 such as leptin (Kawai, Sugimoto et al. 2000, Nakamura, Sanematsu et al. 2008), oxytocin  
426 (Sinclair, Perea-Martinez et al. 2010), glucagon-like peptide-1 (Shin, Martin et al. 2008),  
427 cholecystokinin (Hajnal, Covasa et al. 2005), and the central nervous system peptides orexin  
428 neuropeptide Y, and opioids (Yirmiya, Lieblich et al. 1988, Marks-Kaufman, Hamm et al. 1989,  
429 Dym, Pinhas et al. 2007, Olszewski and Levine 2007), as well as the dopamine D2 receptor  
430 (Bulwa, Sharlin et al. , Schneider 1989, Dym, Pinhas et al. 2009, Eny, Corey et al. 2009).  
431 Furthermore, sucrose intake is controlled by mechanisms beyond the peripheral taste for caloric  
432 and sweet substances (Sclafani 2001, de Araujo, Oliveira-Maia et al. 2008, de Araujo 2012); for  
433 instance, fibroblast growth factor 21 mediates endocrine control of sugar intake through a  
434 hormonal liver-to-brain feedback loop (von Holstein-Rathlou, BonDurant et al. 2016, Soberg,  
435 Sandholt et al. 2017) independent of peripheral taste (Dushay, Toschi et al. 2015). Except for  
436 *Tas1r3*, none of these genes is located in the seven sucrose QTL regions, so they cannot  
437 account for their contribution to sucrose consumption.

## Genetic controls of sucrose intake

438 We revealed the male-specific QTL (*Scon9*) on Chr15 that affects concentrated sucrose  
439 intake (**Figure 1**). Several studies in mice and other species point to sex-specific QTLs  
440 (Nuzhdin, Pasyukova et al. 1997, Lionikas, Blizard et al. 2003, Jerez-Timaure, Kearney et al.  
441 2004). For instance, there are male-specific QTLs for alcohol consumption (Melo, Shendure et  
442 al. 1996, Peirce, Derr et al. 1998), a sex-specific effect on memory performance when rats drink  
443 10% sucrose daily (Abbott, Morris et al. 2016), and a female-specific QTL (*Dpml*;  
444 chr15:51141298-76910293) for dopamine loss in the neostriatum (which serves as a marker of  
445 nigrostriatal dysfunction) (Sedelis, Hofele et al. 2003).

446 In the genome scan for peripheral neural taste responses to sucrose using F<sub>2</sub> mice, we  
447 detected QTL only to distal Chr4 (*Scon2*; encompassing the sweet taste receptor gene *Tas1r3*).  
448 However, but we cannot rule out linkages for the neural taste responses to sucrose to other  
449 chromosomes: compared with number of mice used for sucrose consumption phenotyping, we  
450 measured neural responses in a much smaller number of F<sub>2</sub> mice, and so there may be lack of  
451 statistical power to detect QTLs with smaller effect sizes in other genome regions. We conclude  
452 that *Tas1r3* is a major factor contributing to the peripheral taste responses to sucrose and that  
453 other sucrose consumption loci are likely independent of peripheral sweet taste.

454 *Slc5a1* (solute carrier family 5, sodium/glucose cotransporter, member 1), harbored in  
455 the *Scon7* (Chr5) QTL region, is expressed in the taste cells and may serve as a mediator of the  
456 T1R-independent sweet taste of sugars (Yee, Sukumaran et al. 2011). Thus, *Slc5a1* can be  
457 considered a candidate gene for *Scon7*. However, there is no significant linkage to this QTL  
458 region for peripheral taste responses to sucrose, suggesting that *Slc5a1* is unlikely a peripheral  
459 taste contributor to sucrose intake. Nevertheless, it is possible that we did not detect linkage of  
460 the neural responses to sucrose to *Scon7* because of the lack of statistical power. We did not  
461 observe any missense variants within this gene between the 129P2/OlaHsd and C57BL/6J  
462 strains (closely related to the 129 and B6 parental strains used in our study), but it is possible

463 that there are functional variants in *Slc5a1* between the C57BL/6ByJ and 129P3/J strains that  
464 are absent between the 129P2/OlaHsd and C57BL/6J strains (that are not genetically identical  
465 with the 129P3/J and C57BL/6ByJ strains).

466 Excess sugar consumption is a public health concern, which is indicated as a major  
467 factor for such human diseases as cardiovascular disease, fatty liver disease, metabolic  
468 syndrome, obesity, and diabetes (Ruff, Suchy et al. 2013). This study identified several novel  
469 loci that control sucrose intake, which may point to novel pathways beyond peripheral taste  
470 sensitivity that could help in understanding the genes involved in sucrose's effects in other  
471 model systems (May, Vaziri et al. 2019), and we may be able to harness these novel  
472 mechanisms to control obesity and diabetes and to complement similar efforts to understand the  
473 genetic effects on human sucrose intake and preference (von Holstein-Rathlou, BonDurant et  
474 al. 2016, Soberg, Sandholt et al. 2017, Hwang, Lin et al. 2019).

## 475 References

- 476 Abbott, K. N., M. J. Morris, R. F. Westbrook and A. C. Reichelt (2016). "Sex-specific effects of  
477 daily exposure to sucrose on spatial memory performance in male and female rats, and  
478 implications for estrous cycle stage." *Physiol Behav* **162**: 52-60.
- 479 Anonymous (Mouse Genomes Project - Query SNPs, indels or SVs. 2011: Wellcome Trust  
480 Sanger Institute).
- 481 Anonymous, M. m. l. m. g. v., National Center for Biotechnology Information
- 482 Bachmanov, A. A., N. P. Bosak, W. B. Floriano, M. Inoue, X. Li, C. Lin, V. O. Murovets, D. R.  
483 Reed, V. A. Zolotarev and G. K. Beauchamp (2011). "Genetics of sweet taste preferences."  
484 *Flavour Fragr J* **26**(4): 286-294.
- 485 Bachmanov, A. A., X. Li, D. R. Reed, J. D. Ohmen, S. Li, Z. Chen, M. G. Tordoff, P. J. de Jong,  
486 C. Wu, D. B. West, A. Chatterjee, D. A. Ross and G. K. Beauchamp (2001). "Positional cloning  
487 of the mouse saccharin preference (Sac) locus." *Chem Senses* **26**(7): 925-933.
- 488 Bachmanov, A. A., D. R. Reed, G. K. Beauchamp and M. G. Tordoff (2002). "Food intake, water  
489 intake, and drinking spout side preference of 28 mouse strains." *Behavior Genetics* **32**: 435-  
490 443.
- 491 Bachmanov, A. A., D. R. Reed, G. K. Beauchamp and M. G. Tordoff (2002). "Food intake, water  
492 intake, and drinking spout side preference of 28 mouse strains." *Behav Genet* **32**(6): 435-443.
- 493 Bachmanov, A. A., D. R. Reed, X. Li and G. K. Beauchamp (2002). "Genetics of sweet taste  
494 preferences." *Pure Appl Chem* **74**(7): 1135-1140.
- 495 Bachmanov, A. A., D. R. Reed, Y. Ninomiya, M. Inoue, M. G. Tordoff, R. A. Price and G. K.  
496 Beauchamp (1997). "Sucrose consumption in mice: major influence of two genetic loci affecting  
497 peripheral sensory responses." *Mamm Genome* **8**(8): 545-548.

- 498 Bachmanov, A. A., D. R. Reed, M. G. Tordoff, R. A. Price and G. K. Beauchamp (1996). "Intake  
499 of ethanol, sodium chloride, sucrose, citric acid, and quinine hydrochloride solutions by mice: a  
500 genetic analysis." *Behav Genet* **26**(6): 563-573.
- 501 Bachmanov, A. A., M. G. Tordoff and G. K. Beauchamp (1996). "Ethanol consumption and taste  
502 preferences in C57BL/6ByJ and 129/J mice." *Alcohol Clin Exp Res* **20**(2): 201-206.
- 503 Bachmanov, A. A., M. G. Tordoff and G. K. Beauchamp (2001). "Sweetener preference of  
504 C57BL/6ByJ and 129P3/J mice." *Chem Senses* **26**(7): 905-913.
- 505 Benjamini, Y., and Hochberg, Y (1995). "Controlling the false discovery rate: a practical and  
506 powerful approach to multiple testing. *Journal of the Royal Statistical Society Series B*, 57, 289–  
507 300."
- 508 Broman, K. W., H. Wu, S. Sen and G. A. Churchill (2003). "R/qtl: QTL mapping in experimental  
509 crosses." *Bioinformatics* **19**(7): 889-890.
- 510 Bulwa, Z. B., J. A. Sharlin, P. J. Clark, T. K. Bhattacharya, C. N. Kilby, Y. Wang and J. S.  
511 Rhodes "Increased consumption of ethanol and sugar water in mice lacking the dopamine D2  
512 long receptor." *Alcohol* **45**(7): 631-639.
- 513 Choi, Y. and A. P. Chan (2015). "PROVEAN web server: a tool to predict the functional effect of  
514 amino acid substitutions and indels." *Bioinformatics* **31**(16): 2745-2747.
- 515 Damak, S., M. Rong, K. Yasumatsu, Z. Kokrashvili, V. Varadarajan, S. Zou, P. Jiang, Y.  
516 Ninomiya and R. F. Margolskee (2003). "Detection of sweet and umami taste in the absence of  
517 taste receptor T1r3." *Science* **301**(5634): 850-853.
- 518 Danilova, V. and G. Hellekant (2003). "Comparison of the responses of the chorda tympani and  
519 glossopharyngeal nerves to taste stimuli in C57BL/6J mice." *BMC Neurosci* **4**: 5.
- 520 Davis, S. and P. S. Meltzer (2007). "GEOquery: a bridge between the Gene Expression  
521 Omnibus (GEO) and BioConductor." *Bioinformatics* **23**(14): 1846-1847.
- 522 de Araujo, I. E. (2012). "Multiple Reward Layers in Food Reinforcement."
- 523 de Araujo, I. E., A. J. Oliveira-Maia, T. D. Sotnikova, R. R. Gainetdinov, M. G. Caron, M. A.  
524 Nicolelis and S. A. Simon (2008). "Food reward in the absence of taste receptor signaling."  
525 *Neuron* **57**(6): 930-941.
- 526 Delignette-Muller, M., Pouillot, R., Denis, J., and Dutang, C. "fitdistrplus: Help to Fit of a  
527 Parametric Distribution to Non-Censored or Censored Data. R package. 2014."
- 528 Dushay, J. R., E. Toschi, E. K. Mitten, F. M. Fisher, M. A. Herman and E. Maratos-Flier (2015).  
529 "Fructose ingestion acutely stimulates circulating FGF21 levels in humans." *Mol Metab* **4**(1): 51-  
530 57.
- 531 Dym, C. T., A. Pinhas, M. Ginzberg, B. Kest and R. J. Bodnar (2007). "Genetic variance  
532 contributes to naltrexone-induced inhibition of sucrose intake in inbred and outbred mouse  
533 strains." *Brain Res* **1135**(1): 136-145.
- 534 Dym, C. T., A. Pinhas, M. Robak, A. Sclafani and R. J. Bodnar (2009). "Genetic variance  
535 contributes to dopamine receptor antagonist-induced inhibition of sucrose intake in inbred and  
536 outbred mouse strains." *Brain Res* **1257**: 40-52.
- 537 Eny, K. M., P. N. Corey and A. El-Sohemy (2009). "Dopamine D2 receptor genotype (C957T)  
538 and habitual consumption of sugars in a free-living population of men and women." *J Nutrigenet*  
539 *Nutrigenomics* **2**(4-5): 235-242.
- 540 Hajnal, A., M. Covasa and N. T. Bello (2005). "Altered taste sensitivity in obese, prediabetic  
541 OLETF rats lacking CCK-1 receptors." *Am J Physiol Regul Integr Comp Physiol* **289**(6): R1675-  
542 1686.
- 543 Hwang, L. D., C. Lin, P. Gharakhani, G. Cuellar-Partida, J. S. Ong, J. An, S. D. Gordon, G.  
544 Zhu, S. MacGregor, D. A. Lawlor, P. A. S. Breslin, M. J. Wright, N. G. Martin and D. R. Reed  
545 (2019). "New insight into human sweet taste: a genome-wide association study of the  
546 perception and intake of sweet substances." *Am J Clin Nutr*.
- 547 Inoue, M., J. I. Glendinning, M. L. Theodorides, S. Harkness, X. Li, N. Bosak, G. K. Beauchamp  
548 and A. A. Bachmanov (2007). "Allelic variation of the Tas1r3 taste receptor gene selectively



549 affects taste responses to sweeteners: evidence from 129.B6-Tas1r3 congenic mice." Physiol  
550 Genomics **32**(1): 82-94.

551 Inoue, M., X. Li, S. A. McCaughey, G. K. Beauchamp and A. A. Bachmanov (2001). "Soa  
552 genotype selectively affects mouse gustatory neural responses to sucrose octaacetate."  
553 Physiological Genomics **5**: 181-186.

554 Inoue, M., S. A. McCaughey, A. A. Bachmanov and G. K. Beauchamp (2001). "Whole-nerve  
555 chorda tympani responses to sweeteners in C57BL/6ByJ and 129P3/J mice." Chemical Senses  
556 **26**: 915-923.

557 Inoue, M., S. A. McCaughey, A. A. Bachmanov and G. K. Beauchamp (2001). "Whole nerve  
558 chorda tympani responses to sweeteners in C57BL/6ByJ and 129P3/J mice." Chem Senses  
559 **26**(7): 915-923.

560 Inoue, M., D. R. Reed, X. Li, M. G. Tordoff, G. K. Beauchamp and A. A. Bachmanov (2004).  
561 "Allelic variation of the Tas1r3 taste receptor gene selectively affects behavioral and neural taste  
562 responses to sweeteners in the F2 hybrids between C57BL/6ByJ and 129P3/J mice." J  
563 Neurosci **24**(9): 2296-2303.

564 Jerez-Timaure, N. C., F. Kearney, E. B. Simpson, E. J. Eisen and D. Pomp (2004).  
565 "Characterization of QTL with major effects on fatness and growth on mouse chromosome 2."  
566 Obes Res **12**(9): 1408-1420.

567 Kawai, K., K. Sugimoto, K. Nakashima, H. Miura and Y. Ninomiya (2000). "Leptin as a  
568 modulator of sweet taste sensitivities in mice." Proc Natl Acad Sci U S A **97**(20): 11044-11049.

569 Keane, T. M., L. Goodstadt, P. Danecek, M. A. White, K. Wong, B. Yalcin, A. Heger, A. Agam,  
570 G. Slater, M. Goodson, N. A. Furlotte, E. Eskin, C. Nellaker, H. Whitley, J. Cleak, D. Janowitz,  
571 P. Hernandez-Pliego, A. Edwards, T. G. Belgard, P. L. Oliver, R. E. McIntyre, A. Bhomra, J.  
572 Nicod, X. Gan, W. Yuan, L. van der Weyden, C. A. Steward, S. Bala, J. Stalker, R. Mott, R.  
573 Durbin, I. J. Jackson, A. Czechanski, J. A. Guerra-Assuncao, L. R. Donahue, L. G. Reinholdt, B.  
574 A. Payseur, C. P. Ponting, E. Birney, J. Flint and D. J. Adams (2011). "Mouse genomic variation  
575 and its effect on phenotypes and gene regulation." Nature **477**(7364): 289-294.

576 Korostynski, M., M. Piechota, D. Kaminska, W. Solecki and R. Przewlocki (2007). "Morphine  
577 effects on striatal transcriptome in mice." Genome Biol **8**(6): R128.

578 Li, X., L. Staszewski, H. Xu, K. Durick, M. Zoller and E. Adler (2002). "Human receptors for  
579 sweet and umami taste." Proc Natl Acad Sci U S A **99**(7): 4692-4696.

580 Lin, C., M. L. Theodorides, A. H. McDaniel, M. G. Tordoff, Q. Zhang, X. Li, N. Bosak, A. A.  
581 Bachmanov and D. R. Reed "QTL analysis of dietary obesity in C57BL/6byj X 129P3/J F2 mice:  
582 diet- and sex-dependent effects." PLoS One **8**(7): e68776.

583 Lin, C., M. L. Theodorides, A. H. McDaniel, M. G. Tordoff, Q. Zhang, X. Li, N. Bosak, A. A.  
584 Bachmanov and D. R. Reed (2013). "QTL analysis of dietary obesity in C57BL/6byj X 129P3/J  
585 F2 mice: diet- and sex-dependent effects." PLoS One **8**(7): e68776.

586 Lionikas, A., D. A. Blizard, D. J. Vandenberg, M. G. Glover, J. T. Stout, G. P. Vogler, G. E.  
587 McClearn and L. Larsson (2003). "Genetic architecture of fast- and slow-twitch skeletal muscle  
588 weight in 200-day-old mice of the C57BL/6J and DBA/2J lineage." Physiol Genomics **16**(1): 141-  
589 152.

590 Marks-Kaufman, R., M. W. Hamm and G. F. Barbato (1989). "The effects of dietary sucrose on  
591 opiate receptor binding in genetically obese (ob/ob) and lean mice." J Am Coll Nutr **8**(1): 9-14.

592 May, C. E., A. Vaziri, Y. Q. Lin, O. Grushko, M. Khabiri, Q. P. Wang, K. J. Holme, S. D.  
593 Pletcher, P. L. Freddolino, G. G. Neely and M. Dus (2019). "High Dietary Sugar Reshapes  
594 Sweet Taste to Promote Feeding Behavior in Drosophila melanogaster." Cell Rep **27**(6): 1675-  
595 1685 e1677.

596 Melo, J. A., J. Shendure, K. Pociask and L. M. Silver (1996). "Identification of sex-specific  
597 quantitative trait loci controlling alcohol preference in C57BL/ 6 mice." Nat Genet **13**(2): 147-  
598 153.

- 599 Mi, H., A. Muruganujan and P. D. Thomas (2013). "PANTHER in 2013: modeling the evolution  
600 of gene function, and other gene attributes, in the context of phylogenetic trees." Nucleic Acids  
601 Res **41**(Database issue): D377-386.
- 602 Nakamura, Y., K. Sanematsu, R. Ohta, S. Shirosaki, K. Koyano, K. Nonaka, N. Shigemura and  
603 Y. Ninomiya (2008). "Diurnal variation of human sweet taste recognition thresholds is correlated  
604 with plasma leptin levels." Diabetes **57**(10): 2661-2665.
- 605 Ninomiya, Y., H. Kajiura and K. Mochizuki (1993). "Differential taste responses of mouse chorda  
606 tympani and glossopharyngeal nerves to sugars and amino acids." Neurosci Lett **163**(2): 197-  
607 200.
- 608 Nuzhdin, S. V., E. G. Pasyukova, C. L. Dilda, Z. B. Zeng and T. F. Mackay (1997). "Sex-specific  
609 quantitative trait loci affecting longevity in *Drosophila melanogaster*." Proc Natl Acad Sci U S A  
610 **94**(18): 9734-9739.
- 611 Olszewski, P. K. and A. S. Levine (2007). "Central opioids and consumption of sweet tastants:  
612 when reward outweighs homeostasis." Physiol Behav **91**(5): 506-512.
- 613 Peirce, J. L., R. Derr, J. Shendure, T. Kolata and L. M. Silver (1998). "A major influence of sex-  
614 specific loci on alcohol preference in C57Bl/6 and DBA/2 inbred mice." Mamm Genome **9**(12):  
615 942-948.
- 616 Raymond E Soccio, Z. L., Eric R Chen, Yee Hoon Foong, Kiara K Benson, Joanna R Dispirito,  
617 Shannon E Mullican, Matthew J Emmett, Erika R Briggs, Lindsey C Peed, Richard K Dzeng,  
618 Carlos J Medina, Jennifer F Jolivert, Megan Kissig, Satyajit R Rajapurkar, Manashree Damle,  
619 Hee-Woong Lim, Kyoung-Jae Won, Patrick Seale, David J Steger, Mitchell A Lazar (2017).  
620 "Targeting PPAR $\gamma$  in the Epigenome Rescues Genetic Metabolic Defects in Mice." J Clin Invest.  
621 2017 Apr 3; 127(4): 1451-1462.
- 622 Reed, D. R., S. Li, X. Li, L. Huang, M. G. Tordoff, R. Starling-Roney, K. Taniguchi, D. B. West,  
623 J. D. Ohmen, G. K. Beauchamp and A. A. Bachmanov (2004). "Polymorphisms in the taste  
624 receptor gene (*Tas1r3*) region are associated with saccharin preference in 30 mouse strains." J  
625 Neurosci **24**(4): 938-946.
- 626 Resche-Rigon, M. and I. R. White (2018). "Multiple imputation by chained equations for  
627 systematically and sporadically missing multilevel data." Stat Methods Med Res **27**(6): 1634-  
628 1649.
- 629 Robinson, M. D., D. J. McCarthy and G. K. Smyth (2010). "edgeR: a Bioconductor package for  
630 differential expression analysis of digital gene expression data." Bioinformatics **26**(1): 139-140.
- 631 Ruff, J. S., A. K. Suchy, S. A. Hugentobler, M. M. Sosa, B. L. Schwartz, L. C. Morrison, S. H.  
632 Gieng, M. K. Shigenaga and W. K. Potts (2013). "Human-relevant levels of added sugar  
633 consumption increase female mortality and lower male fitness in mice." Nat Commun **4**: 2245.
- 634 Schneider, L. H. (1989). "Orosensory self-stimulation by sucrose involves brain dopaminergic  
635 mechanisms." Ann N Y Acad Sci **575**: 307-319.
- 636 Sclafani, A. (2001). "Post-ingestive positive controls of ingestive behavior." Appetite **36**(1): 79-  
637 83.
- 638 Sclafani, A. (2004). "Oral and postoral determinants of food reward." Physiol Behav **81**(5): 773-  
639 779.
- 640 Sclafani, A. and K. Ackroff (2004). "The relationship between food reward and satiation  
641 revisited." Physiol Behav **82**(1): 89-95.
- 642 Sedelis, M., K. Hofele, R. K. Schwarting, J. P. Huston and J. K. Belknap (2003). "Chromosomal  
643 loci influencing the susceptibility to the parkinsonian neurotoxin 1-methyl-4-phenyl-1,2,3,6-  
644 tetrahydropyridine." J Neurosci **23**(23): 8247-8253.
- 645 Shin, Y. K., B. Martin, E. Golden, C. D. Dotson, S. Maudsley, W. Kim, H. J. Jang, M. P. Mattson,  
646 D. J. Drucker, J. M. Egan and S. D. Munger (2008). "Modulation of taste sensitivity by GLP-1  
647 signaling." J Neurochem **106**(1): 455-463.
- 648 Sinclair, M. S., I. Perea-Martinez, G. Dvoryanchikov, M. Yoshida, K. Nishimori, S. D. Roper and  
649 N. Chaudhari (2010). "Oxytocin signaling in mouse taste buds." PLoS One **5**(8): e11980.



650 Smyth, G. K. (2005). "Limma: linear models for microarray data. In: Bioinformatics and  
651 Computational Biology Solutions using R and Bioconductor, R. Gentleman, V. Carey, S. Dudoit,  
652 R. Irizarry, W. Huber (eds.), Springer, New York, pages 397-420. ."  
653 Soberg, S., C. H. Sandholt, N. Z. Jespersen, U. Toft, A. L. Madsen, S. von Holstein-Rathlou, T.  
654 J. Grevengoed, K. B. Christensen, W. L. P. Bredie, M. J. Potthoff, T. P. J. Solomon, C. Scheele,  
655 A. Linneberg, T. Jorgensen, O. Pedersen, T. Hansen, M. P. Gillum and N. Grarup (2017).  
656 "FGF21 Is a Sugar-Induced Hormone Associated with Sweet Intake and Preference in  
657 Humans." *Cell Metab* **25**(5): 1045-1053 e1046.  
658 Solberg, L. C., A. E. Baum, N. Ahmadiyah, K. Shimomura, R. Li, F. W. Turek, G. A. Churchill, J.  
659 S. Takahashi and E. E. Redei (2004). "Sex- and lineage-specific inheritance of depression-like  
660 behavior in the rat." *Mamm Genome* **15**(8): 648-662.  
661 Tordoff MG, B. A. (2001). "Monell mouse taste phenotyping project. Monell Chemical Senses  
662 Center." [www.monell.org/MMTPP](http://www.monell.org/MMTPP).  
663 Tordoff, M. G. and A. A. Bachmanov (2002). "Influence of test duration on the sensitivity of the  
664 two-bottle choice test." *Chem Senses* **27**(9): 759-768.  
665 von Holstein-Rathlou, S., L. D. BonDurant, L. Peltekian, M. C. Naber, T. C. Yin, K. E. Clafin, A.  
666 I. Urizar, A. N. Madsen, C. Ratner, B. Holst, K. Karstoft, A. Vandenbeuch, C. B. Anderson, M. D.  
667 Cassell, A. P. Thompson, T. P. Solomon, K. Rahmouni, S. C. Kinnamon, A. A. Pieper, M. P.  
668 Gillum and M. J. Potthoff (2016). "FGF21 mediates endocrine control of simple sugar intake and  
669 sweet taste preference by the liver." *Cell Metab* **23**(2): 335-343.  
670 von Mering, C., L. J. Jensen, B. Snel, S. D. Hooper, M. Krupp, M. Foglierini, N. Jouffre, M. A.  
671 Huynen and P. Bork (2005). "STRING: known and predicted protein-protein associations,  
672 integrated and transferred across organisms." *Nucleic Acids Res* **33**(Database issue): D433-  
673 437.  
674 Yalcin, B., K. Wong, A. Agam, M. Goodson, T. M. Keane, X. Gan, C. Nellaker, L. Goodstadt, J.  
675 Nicod, A. Bhomra, P. Hernandez-Pliego, H. Whitley, J. Cleak, R. Dutton, D. Janowitz, R. Mott,  
676 D. J. Adams and J. Flint (2011). "Sequence-based characterization of structural variation in the  
677 mouse genome." *Nature* **477**(7364): 326-329.  
678 Yang, H., J. R. Wang, J. P. Didion, R. J. Buus, T. A. Bell, C. E. Welsh, F. Bonhomme, A. H. Yu,  
679 M. W. Nachman, J. Pialek, P. Tucker, P. Boursot, L. McMillan, G. A. Churchill and F. P. de  
680 Villena (2011). "Subspecific origin and haplotype diversity in the laboratory mouse." *Nat Genet*  
681 **43**(7): 648-655.  
682 Yee, K. K., S. K. Sukumaran, R. Kotha, T. A. Gilbertson and R. F. Margolskee (2011). "Glucose  
683 transporters and ATP-gated K<sup>+</sup> (KATP) metabolic sensors are present in type 1 taste receptor 3  
684 (T1r3)-expressing taste cells." *Proc Natl Acad Sci U S A* **108**(13): 5431-5436.  
685 Yirmiya, R., I. Lieblich and J. C. Liebeskind (1988). "Reduced saccharin preference in CXBK  
686 (opioid receptor-deficient) mice." *Brain Res* **438**(1-2): 339-342.  
687 York, B., E. L. Reineke, J. V. Sagen, B. C. Nikolai, S. Zhou, J. F. Louet, A. R. Chopra, X. Chen,  
688 G. Reed, J. Noebels, A. M. Adesina, H. Yu, L. J. Wong, A. Tsimelzon, S. Hilsenbeck, R. D.  
689 Stevens, B. R. Wenner, O. Ilkayeva, J. Xu, C. B. Newgard and B. W. O'Malley (2012). "Ablation  
690 of steroid receptor coactivator-3 resembles the human CACT metabolic myopathy." *Cell Metab*  
691 **15**(5): 752-763.  
692 Zhao, G. Q., Y. Zhang, M. A. Hoon, J. Chandrashekar, I. Erlenbach, N. J. Ryba and C. S. Zuker  
693 (2003). "The receptors for mammalian sweet and umami taste." *Cell* **115**(3): 255-266.

694

695 **Figure legends**

696 **Figure 1. Dominance effects for sucrose intake and preference by sex**

697 Data are mean and standard error for intake (left) and preference (right) of 120 mM (top) and  
698 300 mM (bottom) sucrose solutions by male and female parental strains (B6, 129) and F<sub>2</sub> mice.  
699 Values for the F<sub>2</sub> mice (data points with center bar) are displayed at the parent midpoint to show  
700 the direction of dominance, if any. Asterisks indicate a dominant mode of inheritance (as defined  
701 by a significant difference between the F<sub>2</sub> group average and the parental midpoint).

702 **Figure 2. Genome-wide scan of main-effect QTLs for 120 mM sucrose intake and**  
703 **preference**

704 The x-axis shows chromosome numbers and chromosomal locations (in Mb). The y-axis shows  
705 the logarithm of the odds (LOD) scores calculated for adjusted intakes and preferences. The  
706 horizontal dashed lines represent significant linkage thresholds that correspond to an LOD of  
707 3.84 for intake (black) and 3.68 for preference (red). Boxed insets show least-square means  
708 (LSM) and standard errors (SE) for sucrose intakes (black frames) and preferences (red frames)  
709 of the F<sub>2</sub> mice, grouped by genotype of the markers nearest to the linkage peak. Letters (a, b),  
710 when different, indicate statistically significant differences between genotypes (the results of  
711 post hoc tests in a general linear model with habitual water intake as a covariate).

712 **Figure 3. Genome-wide scan of main-effect QTLs for 300 mM sucrose intake and**  
713 **preference**

714 The horizontal dashed lines represent significant linkage thresholds that correspond to an LOD  
715 of 3.61 for intake (black) and 2.90 for preference (red). Other details are the same as for **Figure**  
716 **2**.

717 **Figure 4. Genome-wide scan of sex-specific QTLs for 300 mM sucrose intake**

718 **Bottom panel**, Plots of LOD scores (right y-axis) for genome scans of 300 mM sucrose with sex  
719 as additive covariate (black curve; black horizontal dashed line shows significant linkage  
720 thresholds that correspond to an LOD of 3.61) and sex as additive plus interactive covariate  
721 (blue curve; blue horizontal dashed line shows significant linkage thresholds that correspond to  
722 an LOD of 4.65). Significant linkages were detected on Chr2, 4, 8, and 9 using sex as additive  
723 covariate and on Chr2, 4, 8, 9, and 15 using sex as additive and interactive covariate. The x-  
724 axis shows chromosome numbers and chromosomal locations (in Mb). **Top panel**, Absolute  
725 difference in LOD scores (left y-axis) for each marker. The red horizontal dashed line represents  
726 the threshold for significant sex-specific linkage that corresponds to 2  $\Delta$ LOD. The boxed inset  
727 shows LSM and SE for sucrose intakes of the F<sub>2</sub> mice grouped by sex and genotype of the  
728 markers nearest the linkage peak. Other details are the same as for **Figure 2**.

729 **Figure 5. Genome-wide scan of interacting QTLs *Scon3* and *Scon4* for 300 mM sucrose**  
730 **intake**

731 (A) Heat map for a two-dimensional genome scan with a two-QTL model. The maximum LOD  
732 score for the full model (two QTLs plus an interaction) is indicated in the lower right triangle. The  
733 maximum LOD score for the interaction model is indicated in the upper left triangle. A color-  
734 coded scale displays values for the interaction model (LOD threshold = 6.2) and the full model  
735 (LOD threshold = 9.1) on the left and right, respectively. A red circle in the upper left section  
736 shows significant interaction (LOD = 7.01) between QTLs *Scon3* on Chr9 (108 Mb) and *Scon4*  
737 on Chr1 (9 Mb). (B) LSM  $\pm$  SE for sucrose intakes of the F<sub>2</sub> mice grouped by genotypes of the  
738 markers with the highest epistatic interaction (*rs3714728* and *rs4227916*). The letters (a, b, c),  
739 when different, indicate statistically significant differences between genotypes (Tukey's HSD  
740 test:  $p < 0.05$ ; for details, see the Methods section).

741 **Figure 6. Genome-wide scan of main-effect QTL for peripheral taste responses to**  
742 **sucrose**

743 The horizontal dashed lines represent significant linkage thresholds that correspond to an LOD  
744 of 3.96, 4.17, 4.27, and 3.95 for sucrose concentrations of 100 mM (A), 300 mM (B), 500 mM  
745 (C), and 1000 mM (D), respectively. Boxed insets show means and standard errors for  
746 normalized integrated chorda tympani nerve responses to oral stimulation with sucrose of the F<sub>2</sub>  
747 mice grouped by genotype of the markers nearest the linkage peak. Other details are as for  
748 Figure 2.

749 **Figure 7. Gene expression profiling shows differential expression of candidate genes**  
750 **(n=2675) within the QTL regions between 129 and B6 inbred mouse strains**

751 Microarray-based gene expression analysis data are shown for mouse striatum (A), and bulk  
752 RNASeq analyses for brown (B) and white (C) fat. Red dots show differentially expressed genes  
753 (twofold changes with FDR<0.05) between two inbred strains, but only the top 10 genes are  
754 labeled in B and C. The horizontal dash lines show the corrected significance threshold  
755 (FDR=0.05).

756 **S1 Figure. Imputation of missing data of behavioral phenotypes**

757 (A) Missing data portions of each trait for intake (Int) and preference (Pre) of 3, 120, or 300 mM  
758 sucrose. (B) Summary of missing phenotype data pattern: red, missing data; blue, observed  
759 data. (C) Plausible values for the imputed data points (magenta; imputed by multiple imputation  
760 by chained equations) and observed data points (blue). The x-axis shows imputation numbers:  
761 0 = observed data; 1-5 = data of 1-5 imputations. The y-axis shows intake (ml) or preference  
762 (%).

763 **S2 Figure. Distribution of sucrose intake and preference in female and male F<sub>2</sub> mice**

764 The y-axis shows density, the fraction of number of animals with sucrose intake or preference

## Genetic controls of sucrose intake

765 (x-axis). Colors show different sucrose concentrations, and the white dashed lines indicate  
766 means for each concentration. **Top row**, Unadjusted sucrose intake and preference data.  
767 **Bottom row**, Sucrose intake residual scores standardized to habitual water intakes calculated  
768 within each sex, and sucrose preferences standardized within sex and experiment.

### 769 **S3 Figure. Dominance effects for 3 mM sucrose intake and preference by sex**

770 Data are mean  $\pm$  SE for sucrose solution intake (left) and preference (right) by male and female  
771 parental strains (B6, 129) and F<sub>2</sub> mice. Values for the F<sub>2</sub> mice (data points with center bar) are  
772 displayed at the parent midpoint to show the direction of dominance, if any. Asterisks indicate a  
773 dominant mode of inheritance (as defined by a significant difference between the F<sub>2</sub> group  
774 average and the parental midpoint).

### 775 **S4 Figure. Heat map of Pearson correlations for sucrose intakes and preference scores** 776 **of the F<sub>2</sub> mice (N=623)**

777 Missing and imputed data for each trait are summarized in **S1 Figure**. For correlation analyses  
778 shown here, we used the first imputation (imputation number 1 in S1 Figure).

### 779 **S5 Figure. Correlations between sucrose intake (ml/d) and phenotypes of F<sub>2</sub> mice**

780 Sucrose intake data are shown for unadjusted data (blue) and adjusted residual scores (red).  
781 Phenotypes were sex (M, F), total body weight (BW; g), total body fat (g), body length (cm),  
782 daily habitual water intake (Wat; ml/d), and age (months). N = 452 for 3 and 300 mM sucrose; N  
783 = 623 for 120 mM sucrose.

### 784 **S6 Figure. Correlations between sucrose preference (%) and phenotypes of the F<sub>2</sub> mice.**

785 Sucrose preference data are shown for unadjusted (blue) and adjusted standardization scores  
786 (red). For details, see **S5 Figure**.

787 **S7 Figure. Chorda tympani responses to sucrose (relative to 100 mM NH<sub>4</sub>Cl) in F<sub>2</sub> mice**

788 Data are standardized within sex and experiments, grouped by *Tas1r3* genotype. Values are  
789 means ± standard errors. \*p<0.01, one-way ANOVA.

790 **S8 Figure. Protein-protein associations for genes within the sucrose epistasis QTL**

791 ***Scon3* and *Scon4* confidence interval regions**

792 Protein-protein associations for genes within QTL confidence intervals of *Scon4* (on Chr1)  
793 *Scon3* (on Chr9) (see **S11 Table**) identified by searching protein names using information from  
794 high-throughput experimental data, mining of literature databases, and predictions based on  
795 genomic context analysis.

796

797

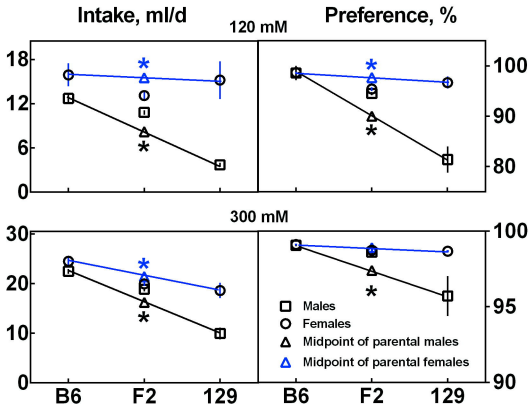

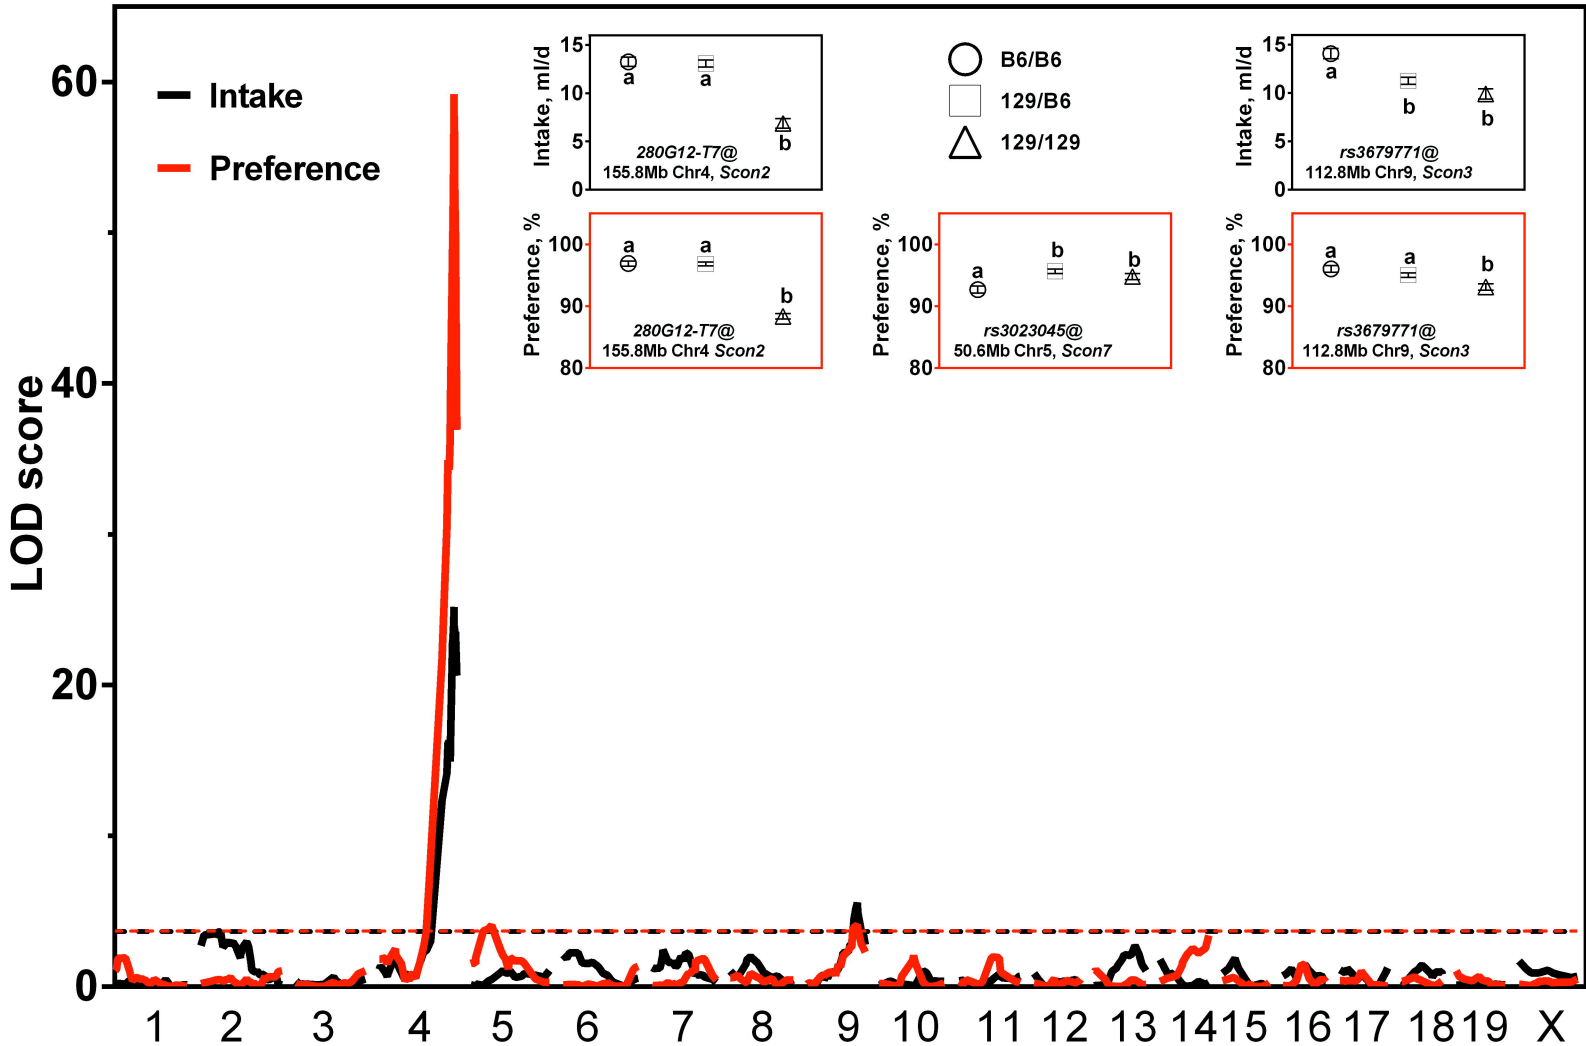



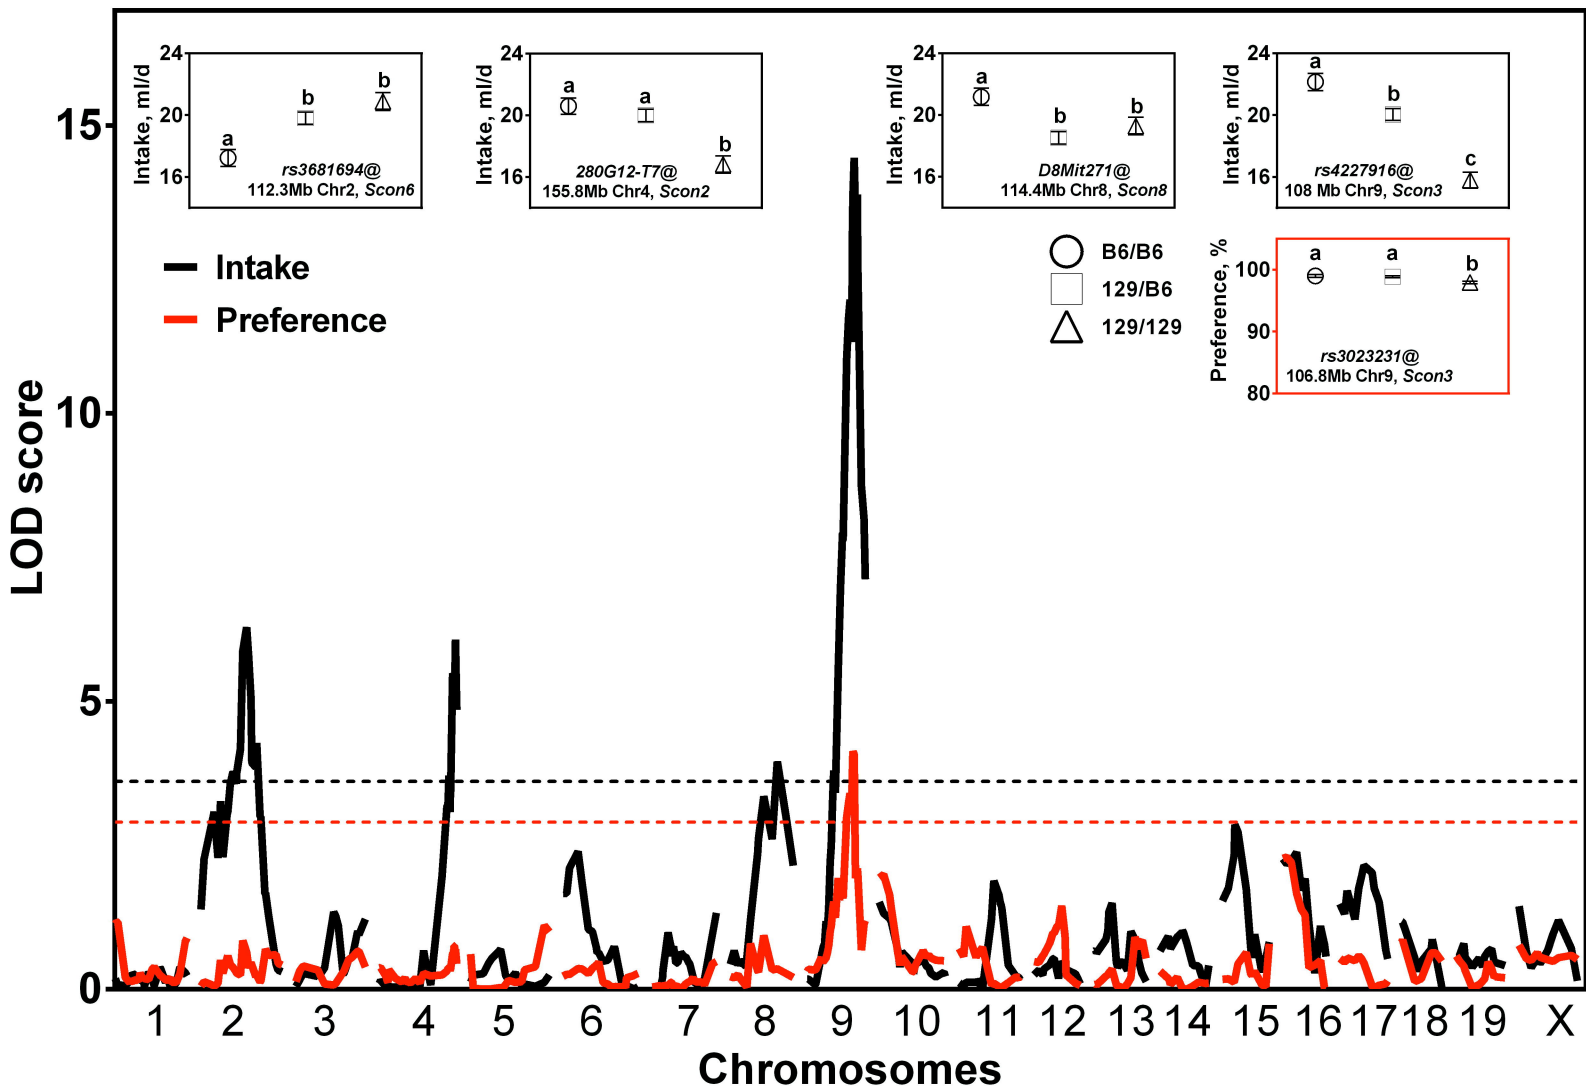

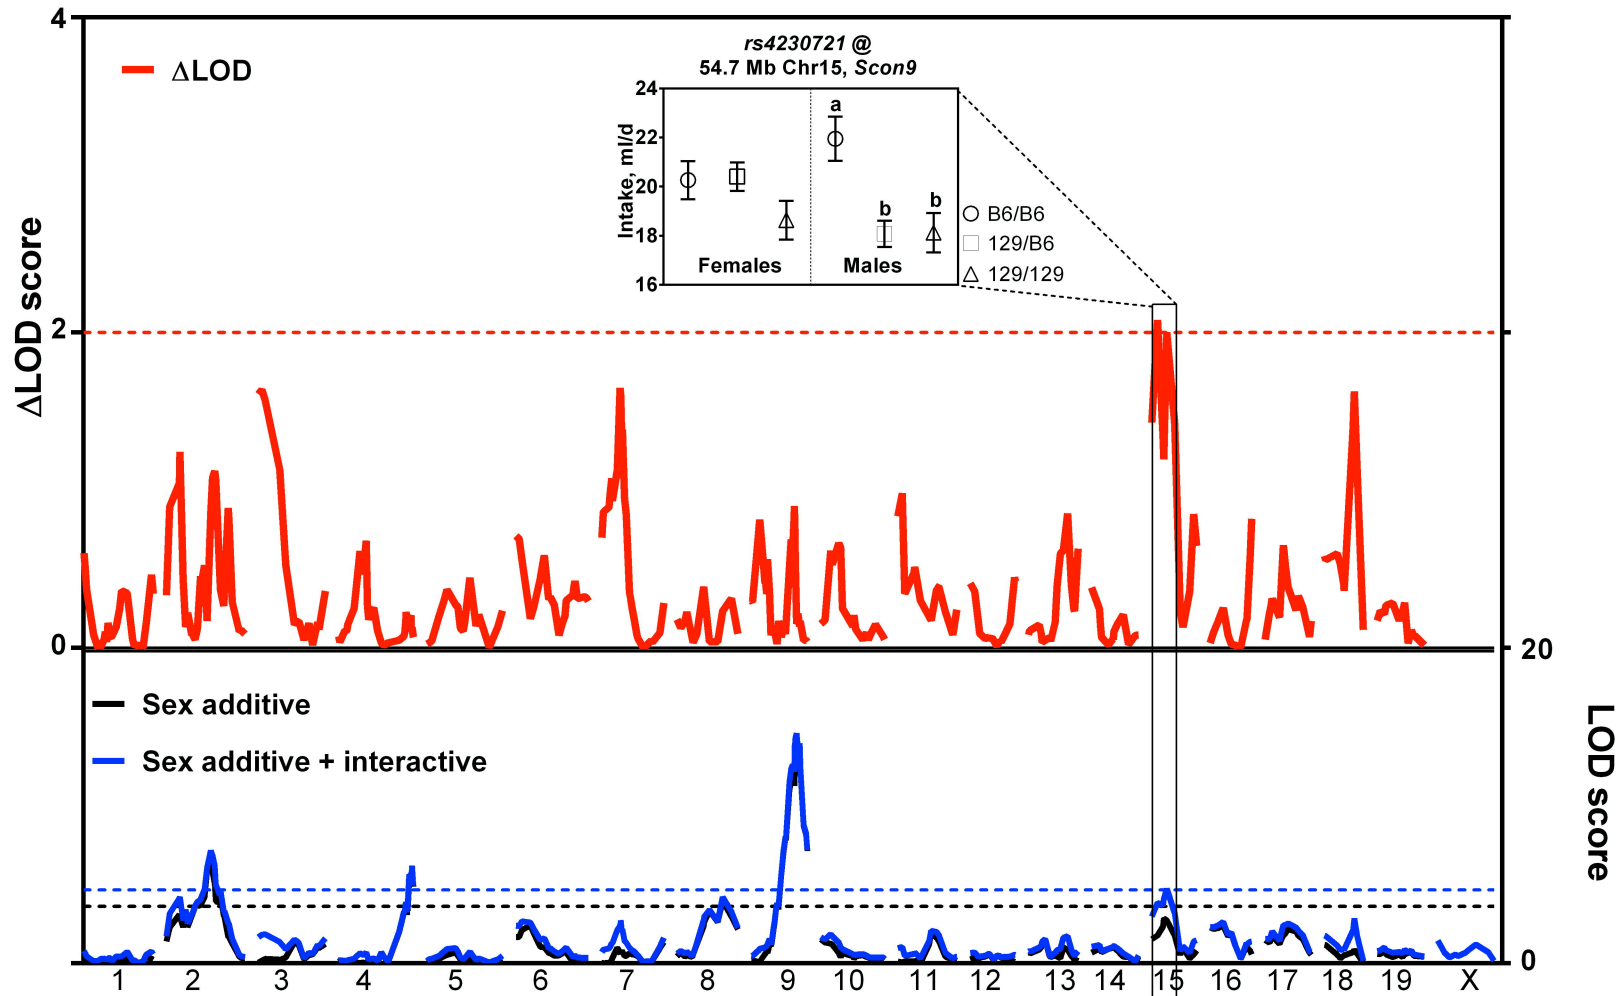

**A**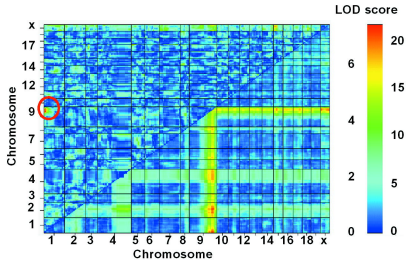**B**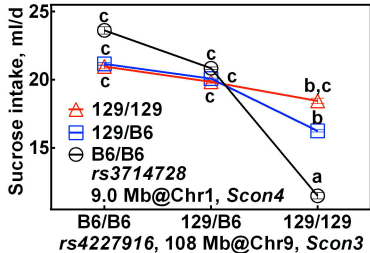

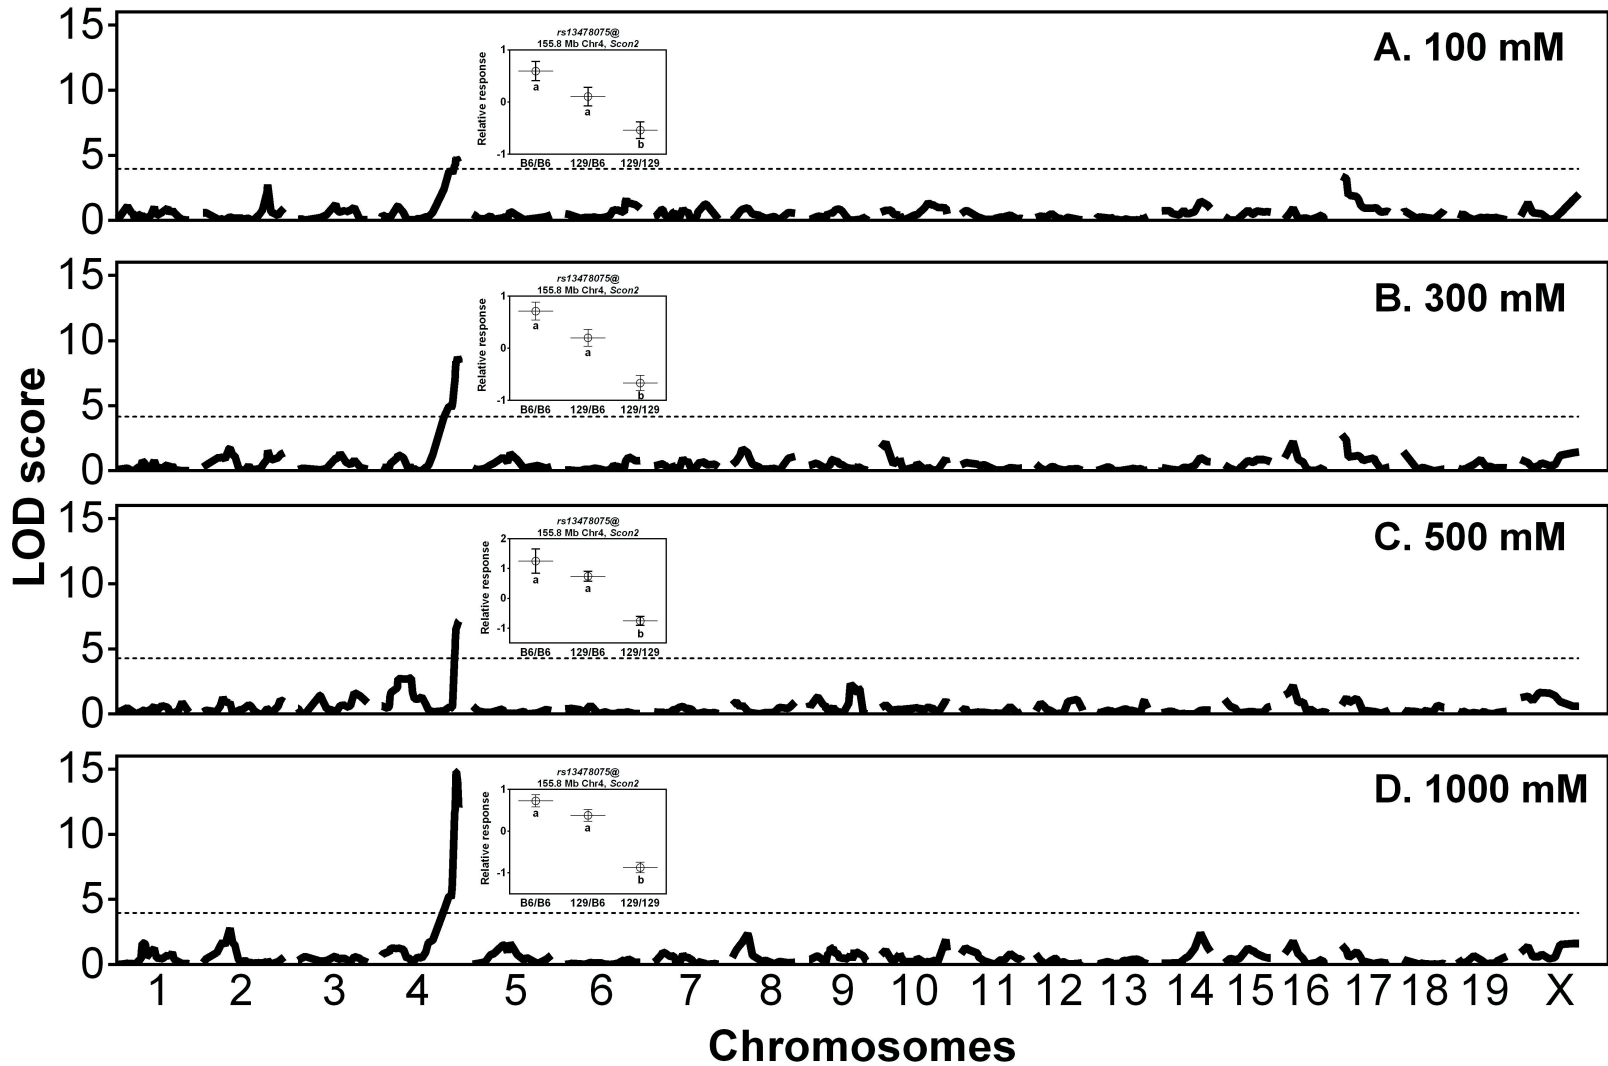

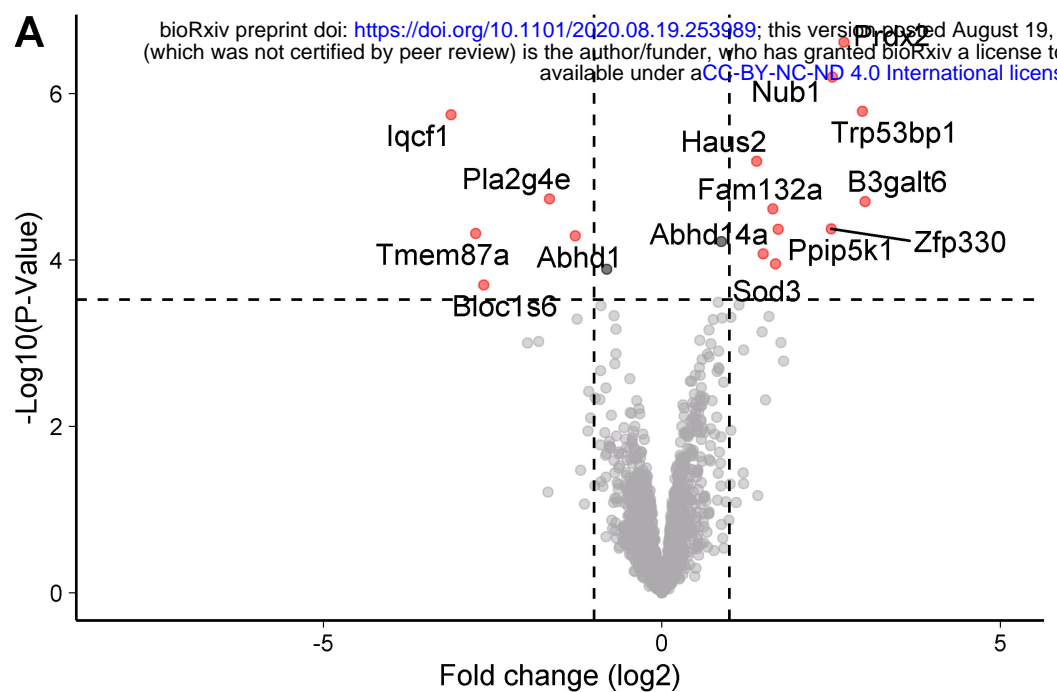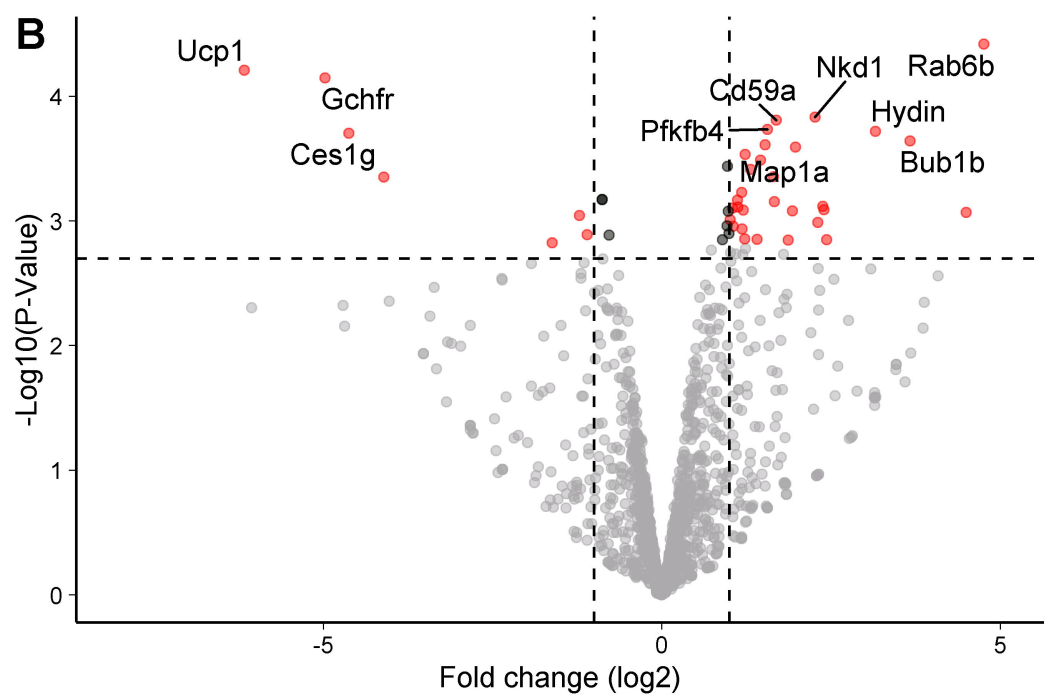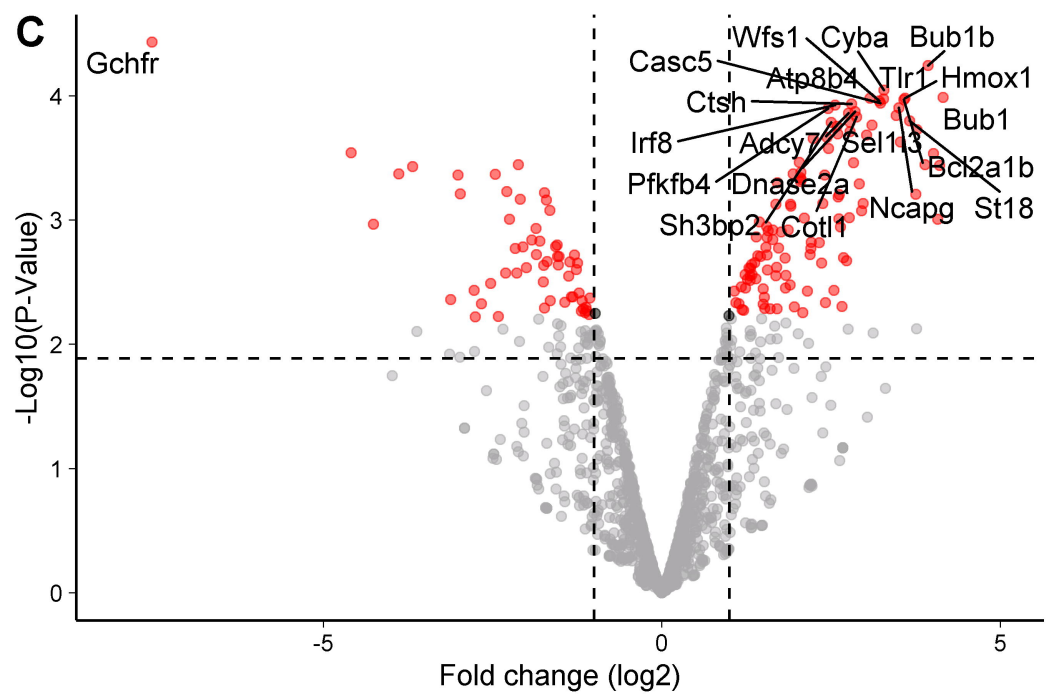

Source: https://www.biorxiv.org/content/10.1101/2020.08.19.253989v1.full.pdf
